# Supplementary material for: Integration of 3D Hydrodynamic Focused Microreactor with Microfluidic Chemiluminescence Sensing for Online Synthesis and Catalytical Characterization of Gold Nanoparticles
Source: PubMed Central journal article supplement (PMC8036713; doi:10.3390/s21072290), 2021-03-25
Supplement: sensors-21-02290-s001.pdf [file sensors-21-02290-s001.pdf]

## Supporting information

# Integration of 3D hydrodynamic focused microreactor with microfluidic chemiluminescence sensing for online synthesis and catalytical characterization of gold nanoparticles

Yanwei Wang and Michael Seidel\*

Institute of Hydrochemistry, Chair of Analytical Chemistry and Water Chemistry, Technical University of Munich, Elisabeth-Winterhalter-Weg 6, 81377 Munich, Germany.  
Yanwei.wang@tum.de

\* Correspondence: E-mail: Michael.Seidel@mytum.de, Tel: +49 89 2180 78252, Fax: +49 89 2180 78255

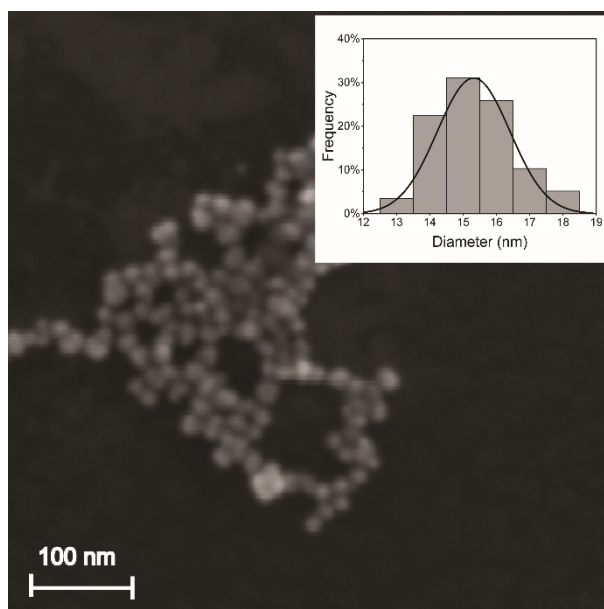

Figure S 1. SEM images of synthesized AuNPs with optimal synthesis conditions. Histograms with the respective particle size distributions and the percentage are included as inset.
